# Supplementary material for: Evidence for a three-phase sequence during Heinrich Stadial 4 using a multiproxy approach based on Greenland ice core records
Source: Copernicus journal article supplement (doi:10.5194/cp-10-2115-2014), 2014-12-02
Supplement: Supplementary file 1 [file cp-10-2115-2014-supplement.zip]

Supplement of Clim. Past, 10, 2115–2133, 2014  
<http://www.clim-past.net/10/2115/2014/>  
doi:10.5194/cp-10-2115-2014-supplement  
© Author(s) 2014. CC Attribution 3.0 License.

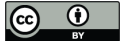

*Supplement of*

## **Evidence for a three-phase sequence during Heinrich Stadial 4 using a multiproxy approach based on Greenland ice core records**

**M. Guillevic et al.**

*Correspondence to:* M. Guillevic (mgllvc@nbi.ku.dk)
